# Supplementary material for: Novel Miniature Membrane Active Lipopeptidomimetics against Planktonic and Biofilm Embedded Methicillin-Resistant Staphylococcus aureus
Source: PubMed Central journal article supplement (PMC5773577; doi:10.1038/s41598-017-17234-z), 2018-01-18
Supplement: 41598_2017_17234_MOESM1_ESM.pdf [file 41598_2017_17234_MOESM1_ESM.pdf]

## **ELECTRONIC SUPPLEMENTARY INFORMATION (ESI)**

### **Novel Miniature Membrane Active Lipopeptidomimetics against Planktonic and Biofilm Embedded Methicillin- Resistant *Staphylococcus aureus***

Seema Joshi<sup>a,\*</sup>, Sana Mumtaz<sup>a</sup>, Jyotsna Singh<sup>a</sup>, Santosh Pasha<sup>b</sup> & Kasturi Mukhopadhyay<sup>a,\*</sup>

Antimicrobial Research Laboratory, School of Environmental Sciences, Jawaharlal Nehru University, New Delhi-110067, India<sup>a</sup>; Peptide Research Laboratory, CSIR-Institute of Genomics and Integrative Biology, Mall Road, New Delhi-110007, India<sup>b</sup>

**\*Corresponding author(s):** [joshi.seema25@gmail.com](mailto:joshi.seema25@gmail.com) or [kasturim@mail.jnu.ac.in](mailto:kasturim@mail.jnu.ac.in)

#### **Table of Contents**

**Fig. S1:** Reverse phase-HPLC chromatograms for peptidomimetics S-1 to S-9.

**Fig. S2:** Electrospray ionization-mass spectrometry data for peptidomimetics S-1 to S-9.

**Fig. S3:** Membrane depolarization mechanism using DiSC<sub>3</sub>(5) dye.

**Fig. S4:** Cell viability corresponding to membrane depolarization experiment.

**Fig. S5:** Cell viability corresponding to calcein leakage experiment.

**Fig. S6:** Comparative DNA binding ability of designed peptidomimetics.

**Fig. S1.** Representative RP-HPLC chromatograms of peptidomimetics S-1 to S-9 (absorbance at 220 nm). For the HPLC analysis a linear gradient of acetonitrile (0.1% TFA) from 10 to 90% was run for 45 min, where, water (0.1 % TFA) was the second solvent used for chromatography.

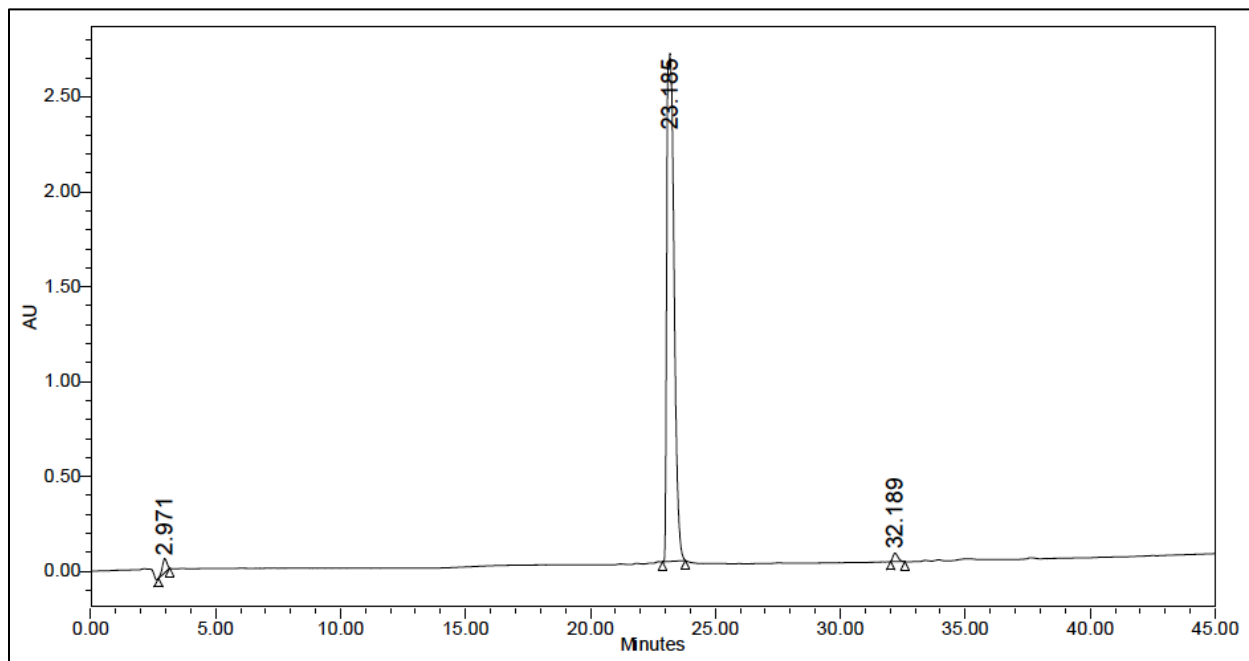

S-1

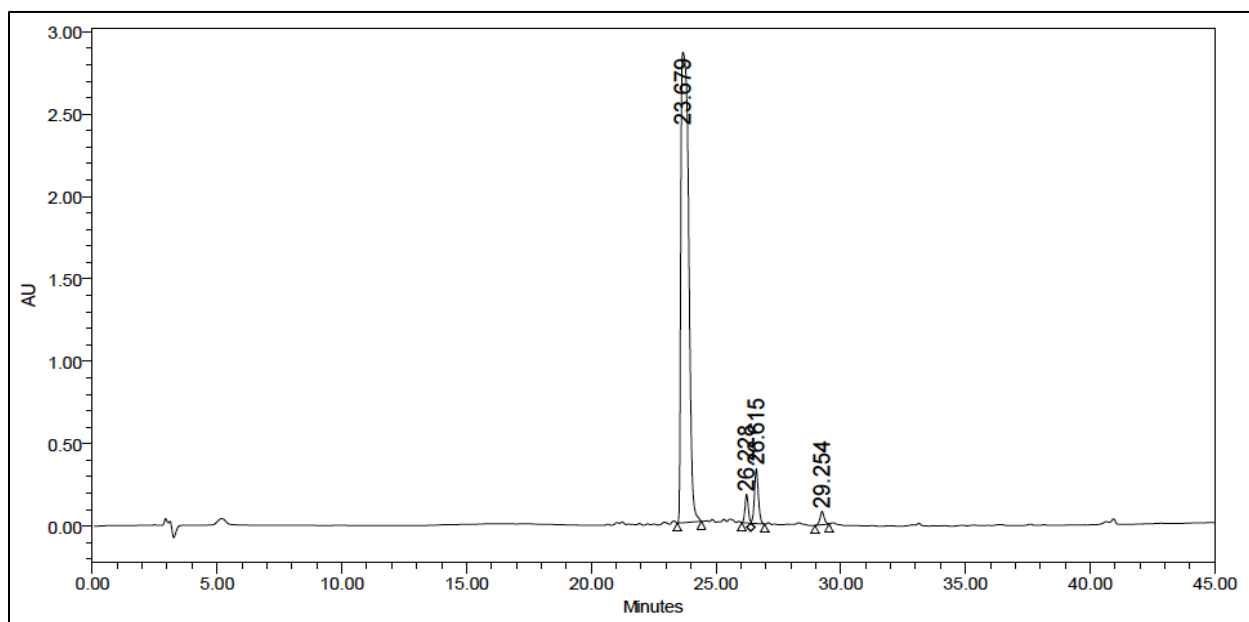

S-2

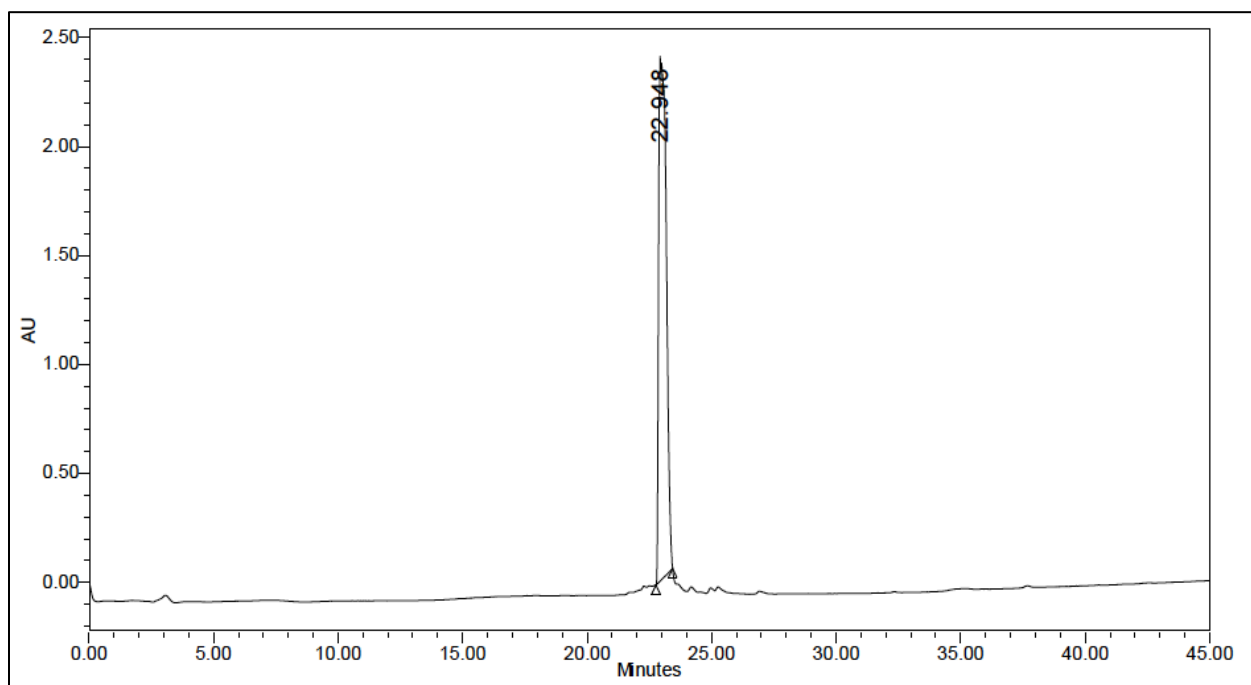

S-3

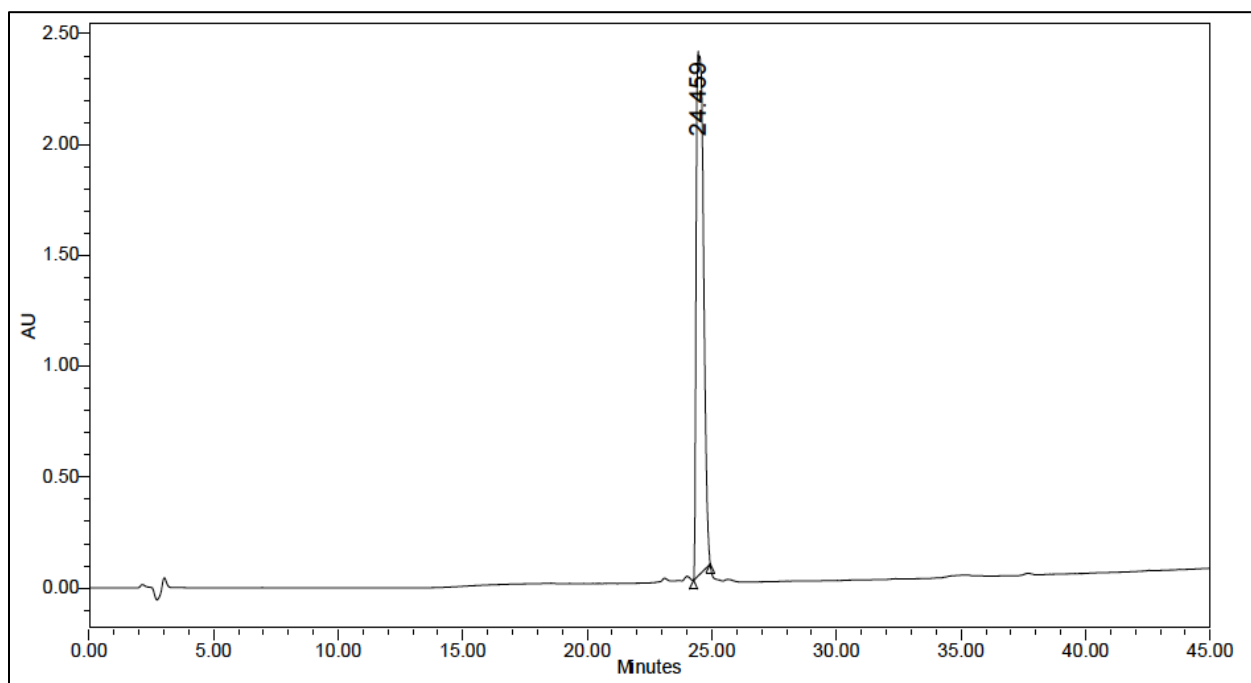

S-4

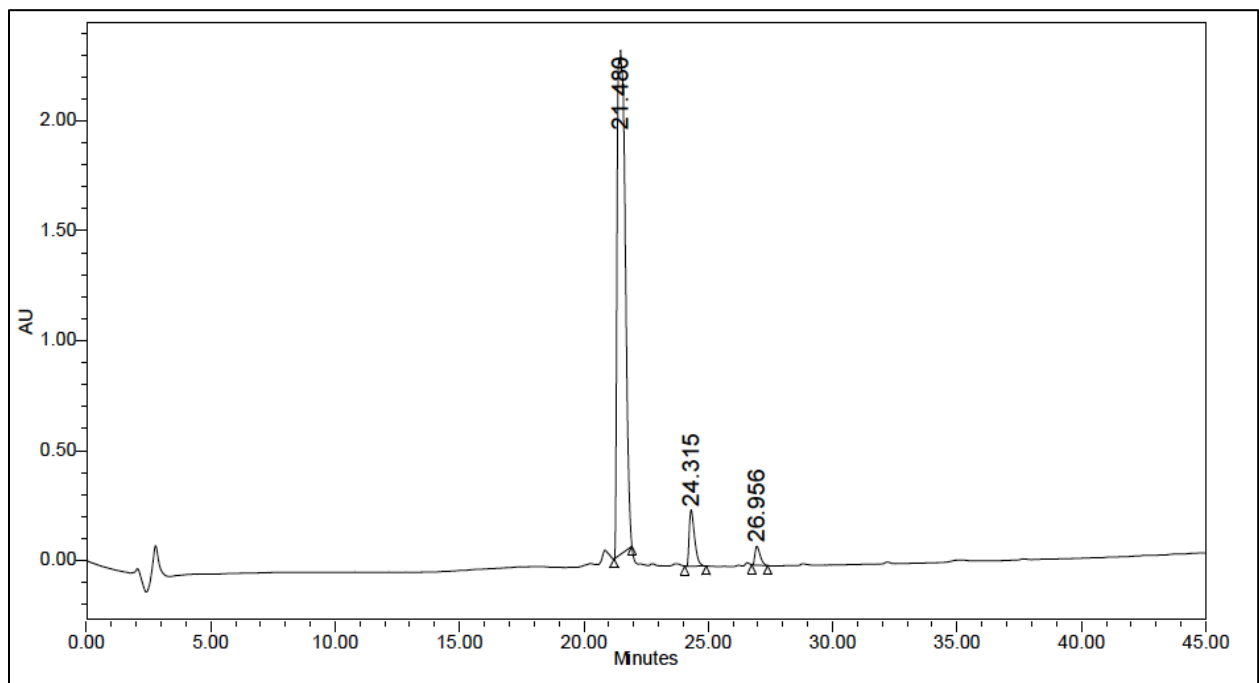

S-5

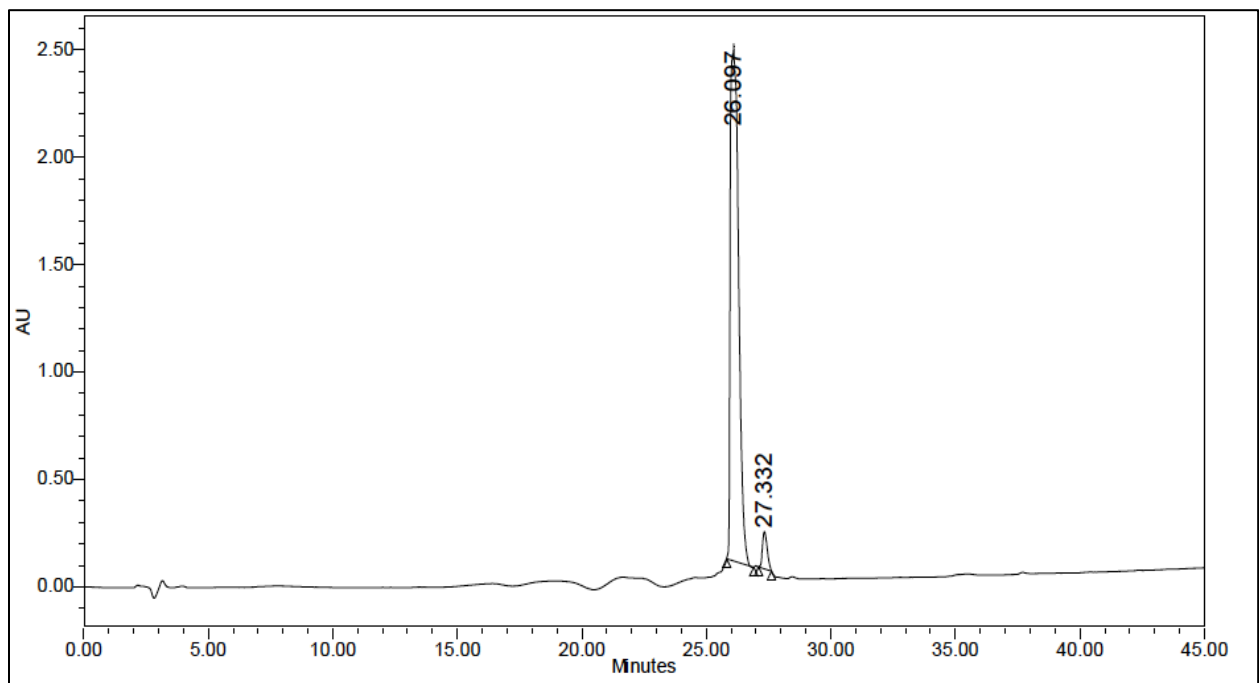

S-6

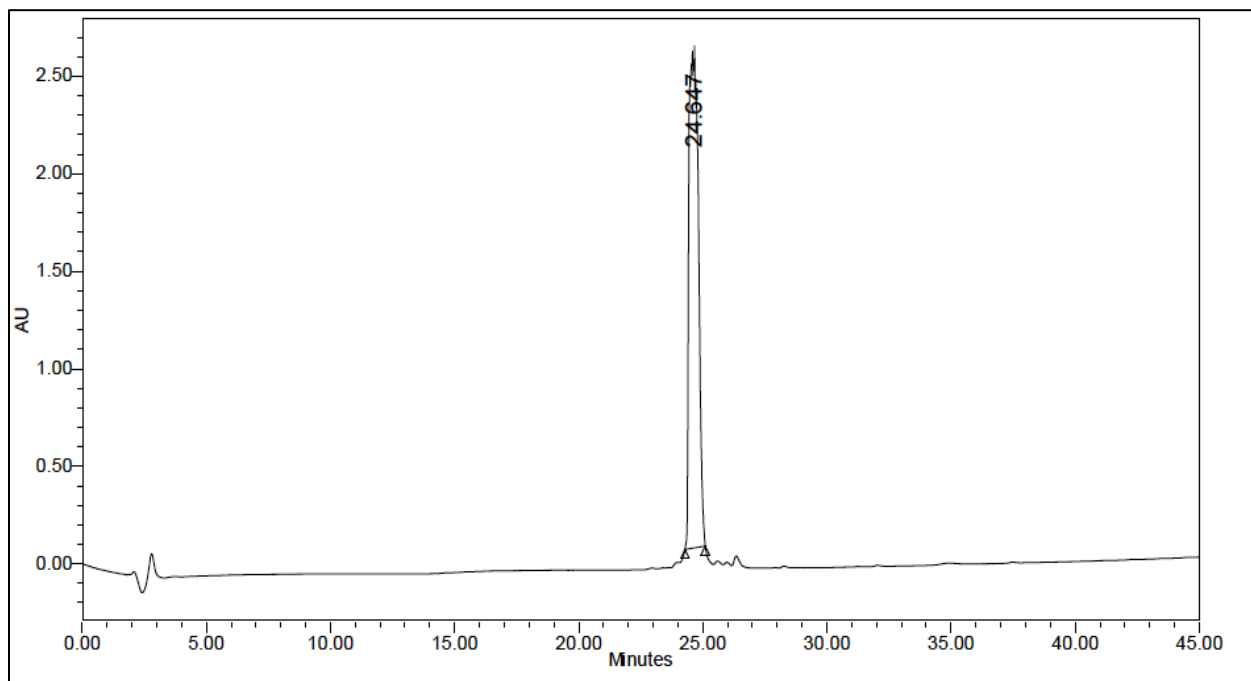

S-7

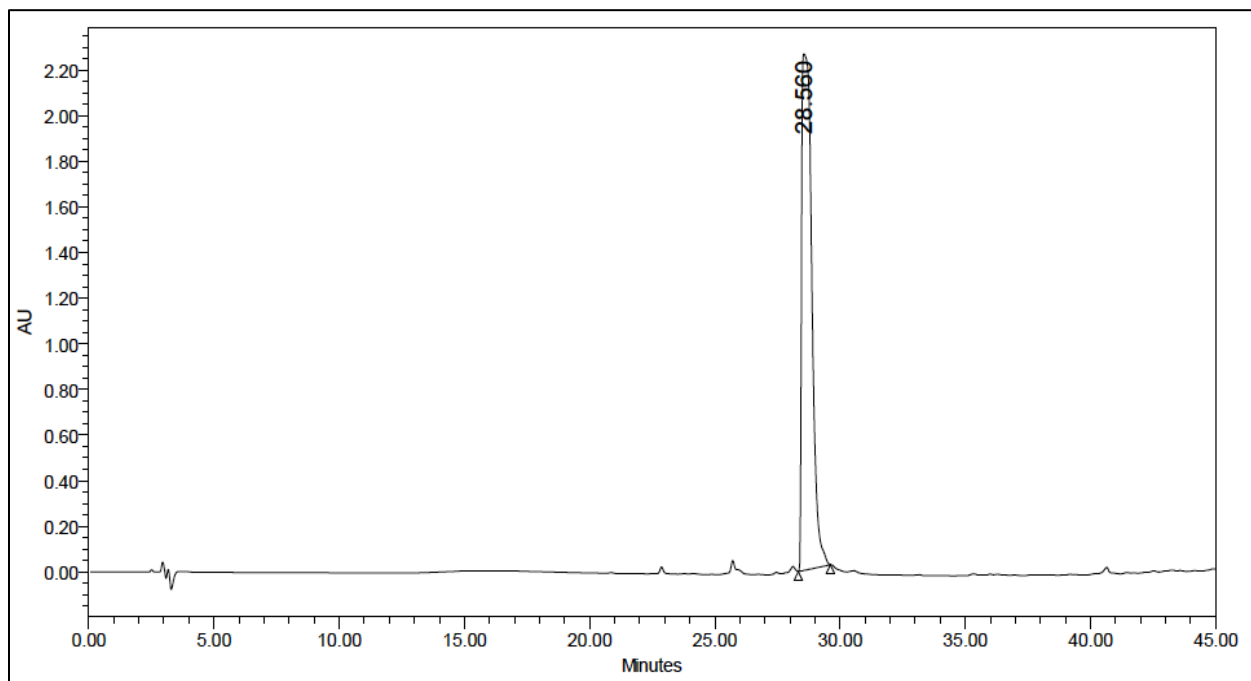

S-8

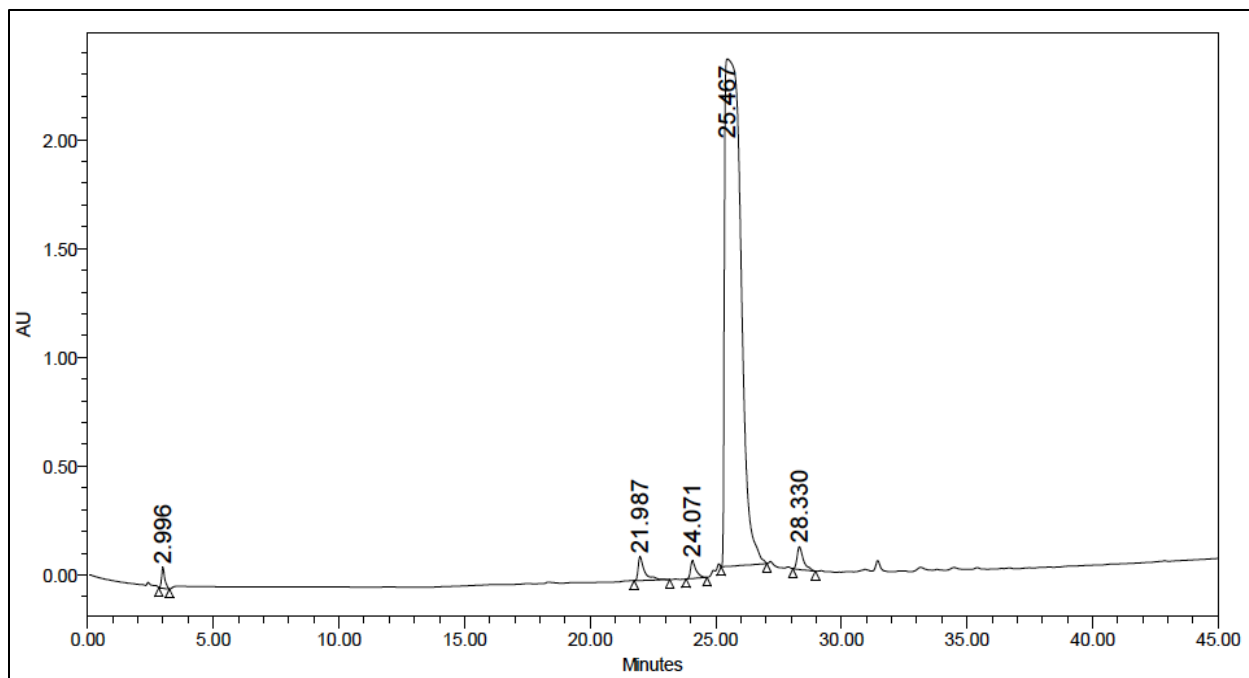

S-9

**Fig. S2.** Representative electrospray ionization-mass spectrometry data for peptidomimetics S-1 to S-9. The data was acquired on WATERS SYNAPT G2 mass spectrometer (LockSpray methodology) with Acquity UPLC system.

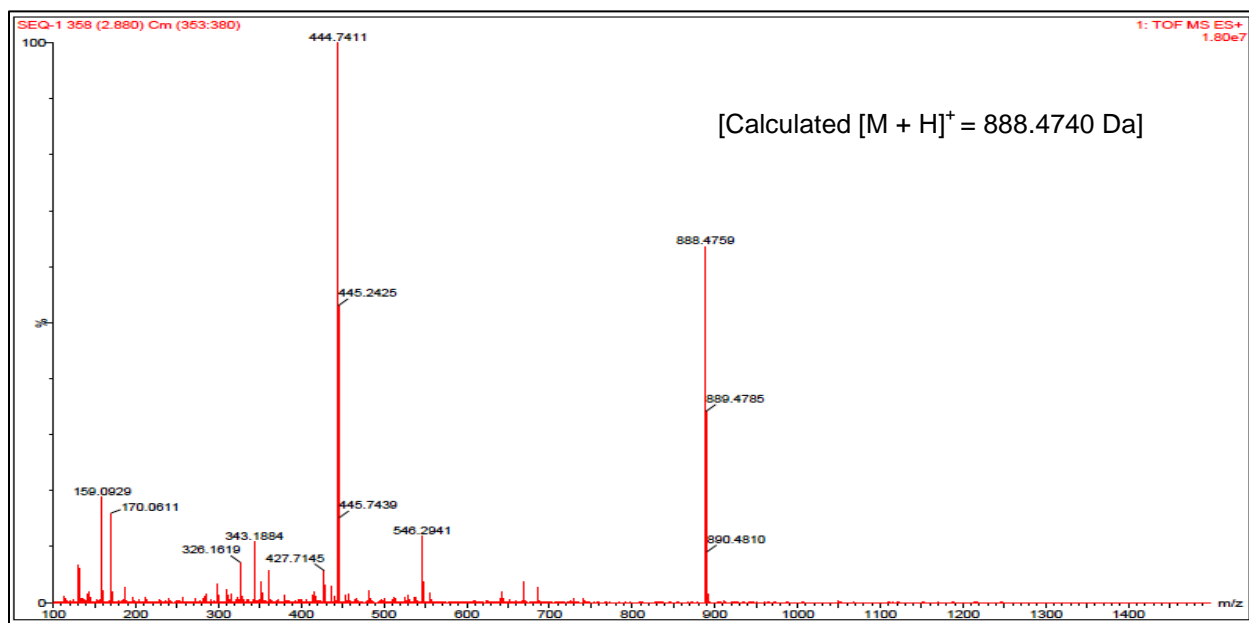

S-1

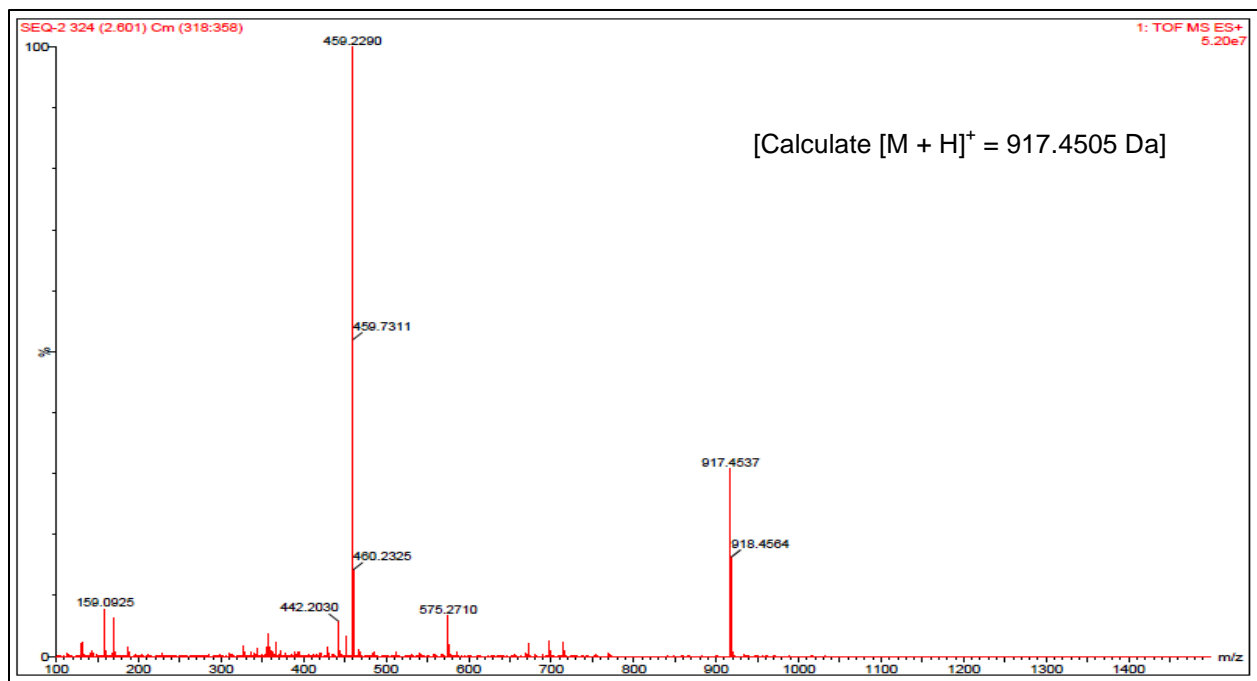

S-2

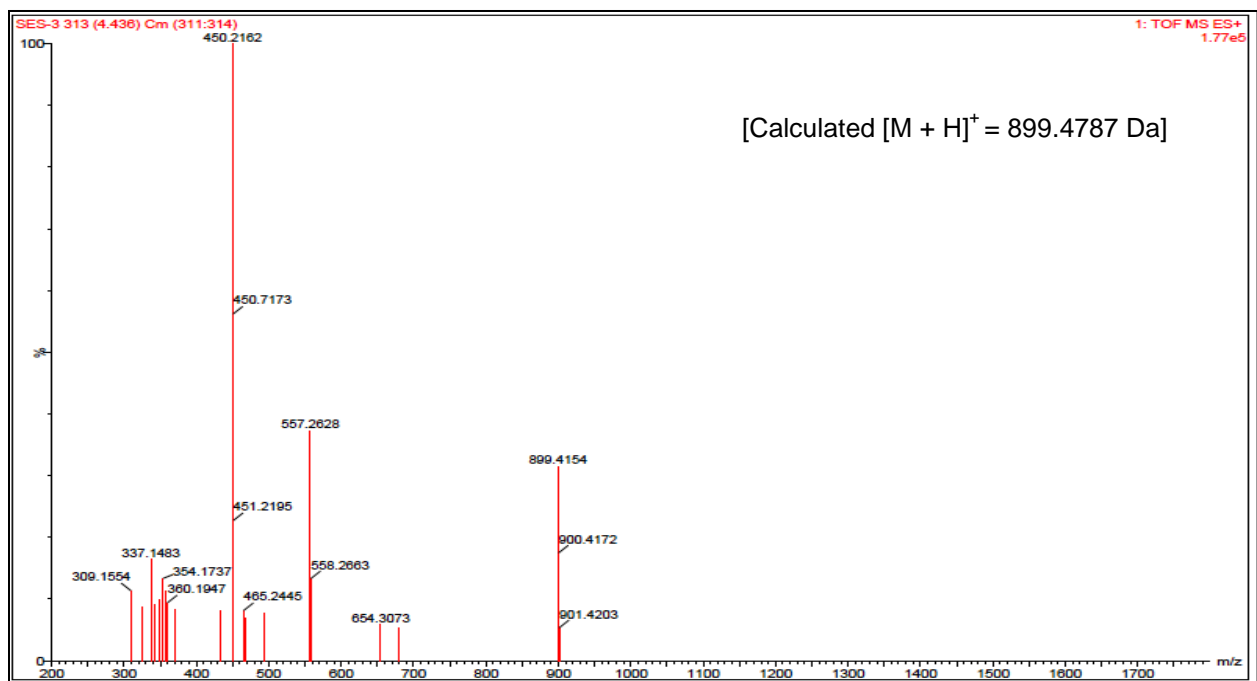

S-3

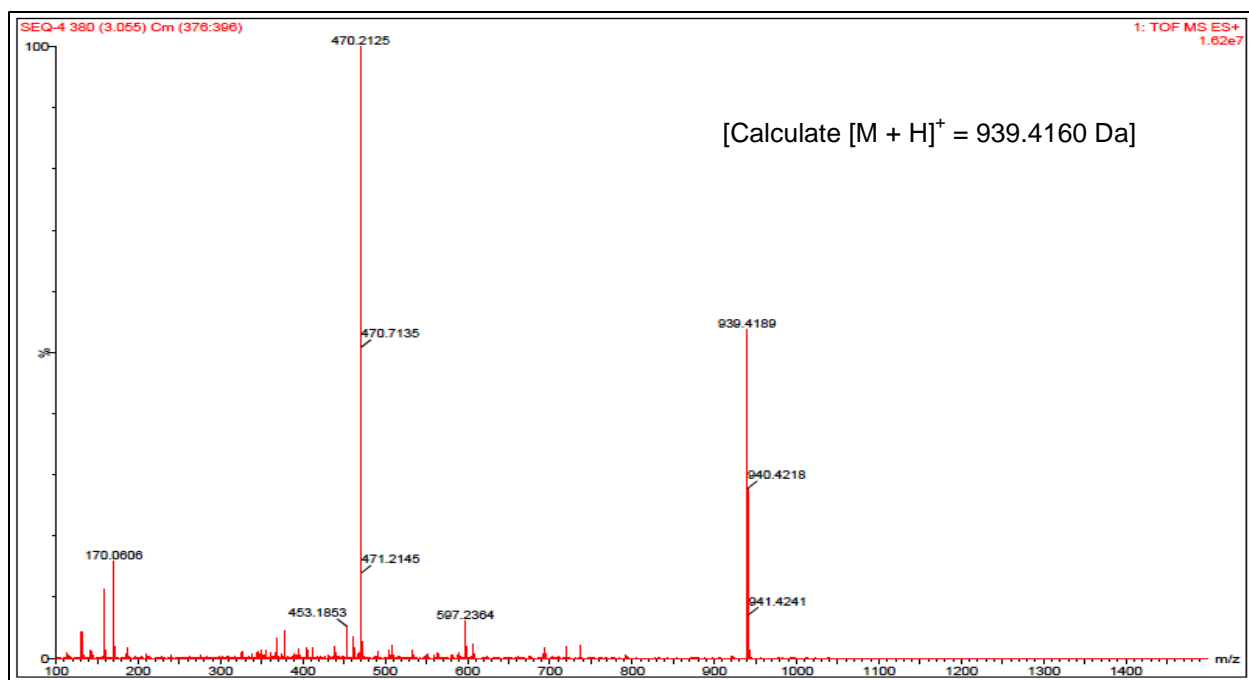

S-4

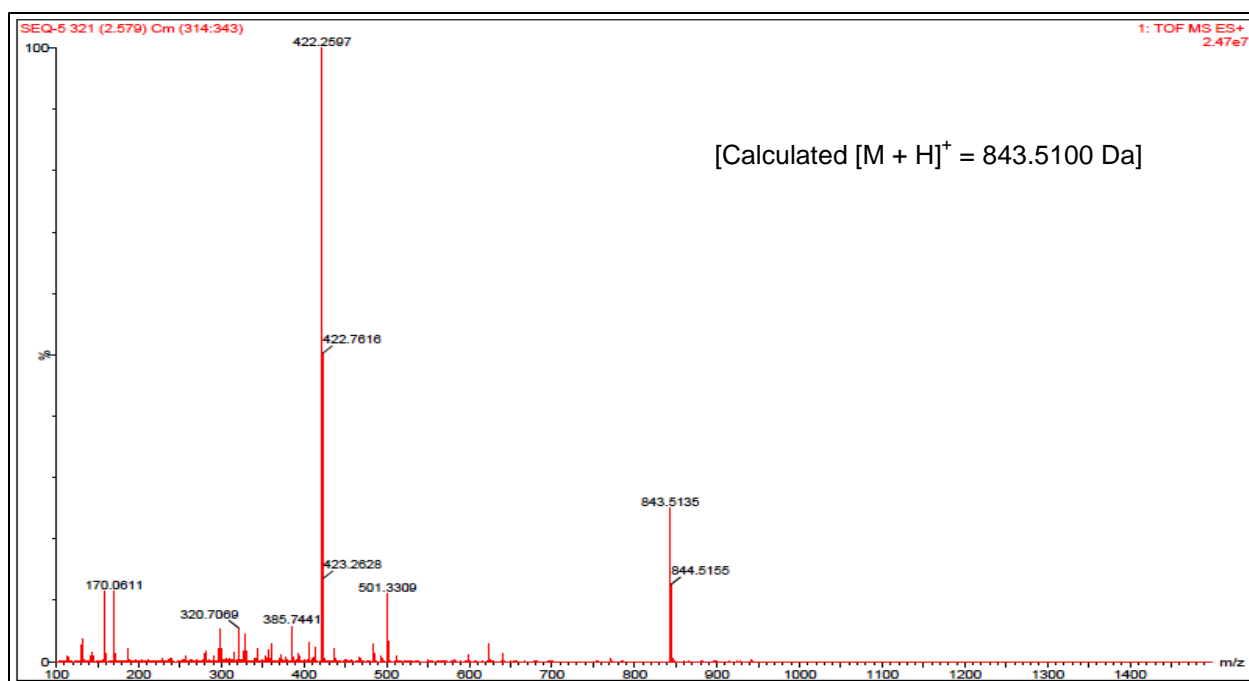

S-5



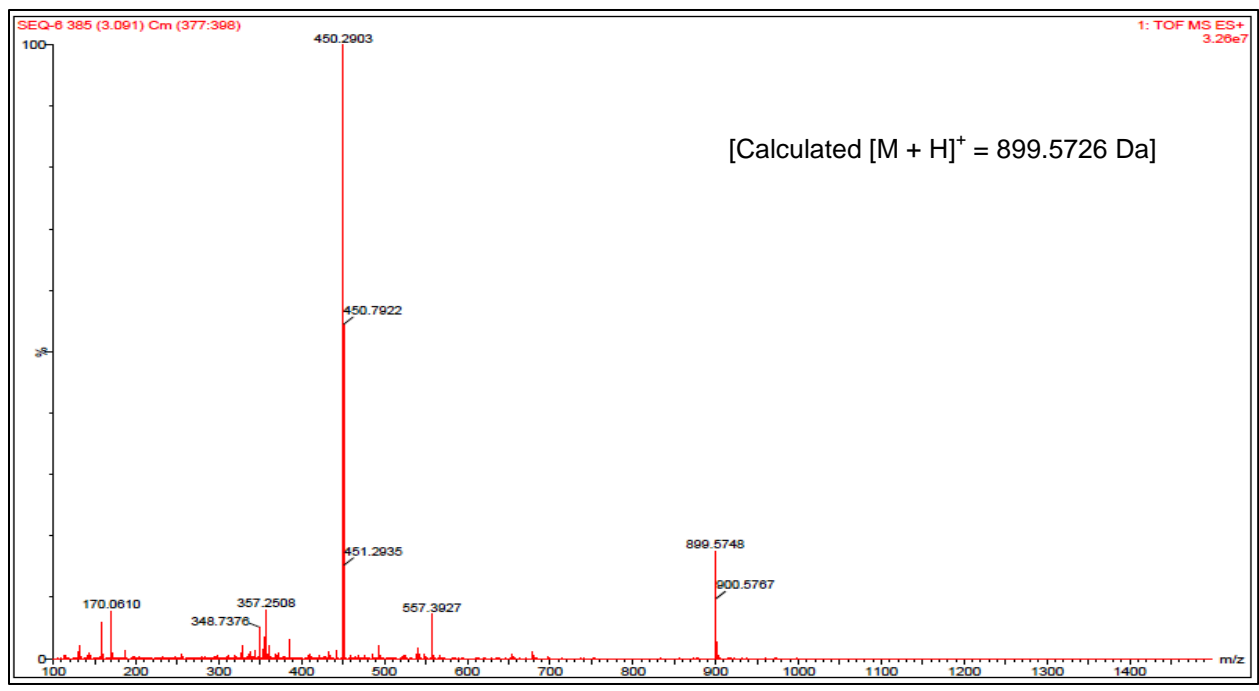

S-6

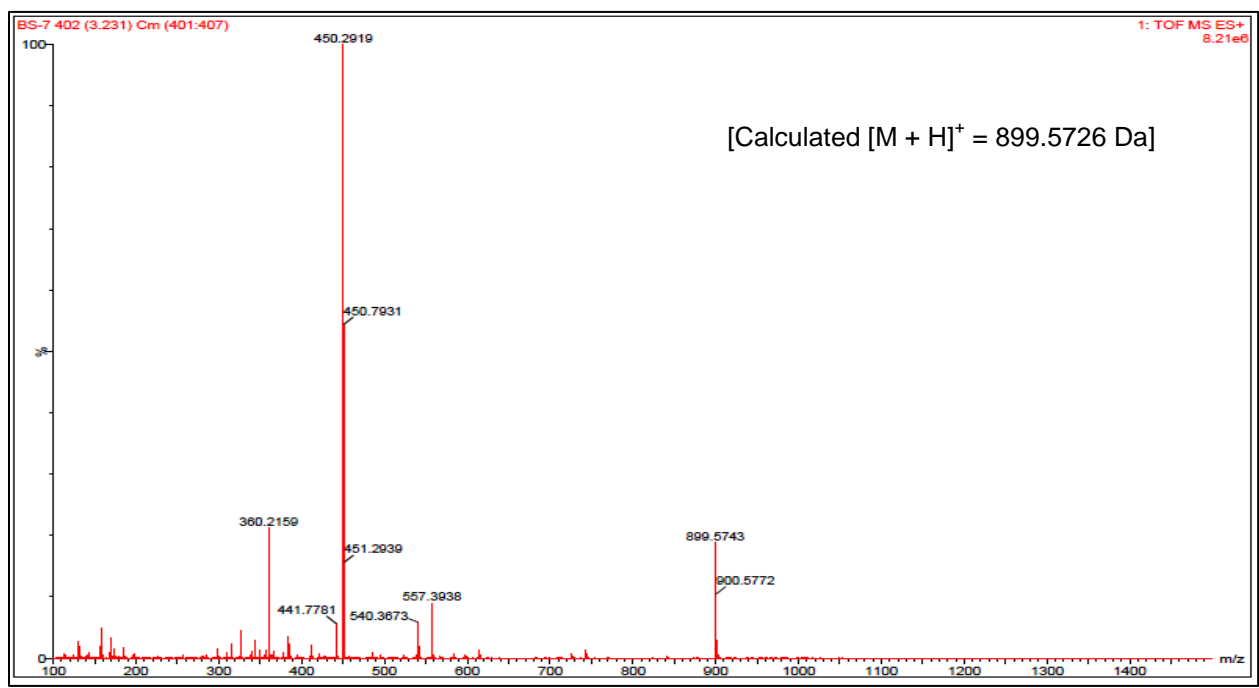

S-7

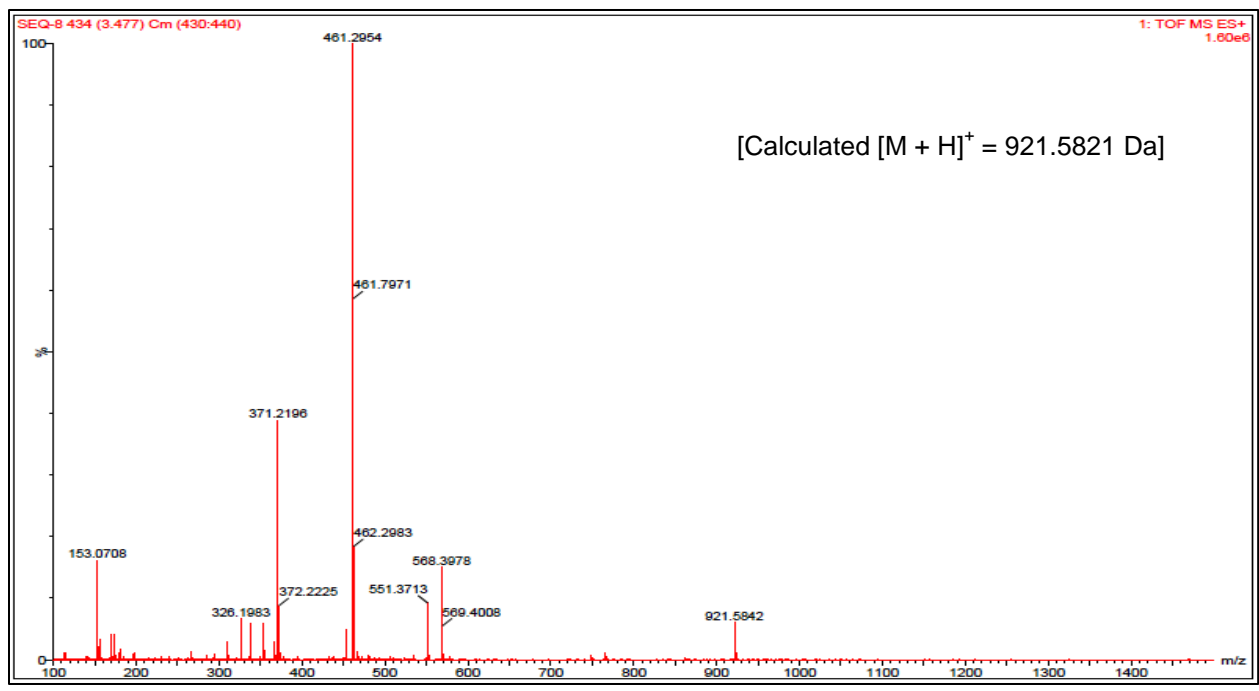

S-8

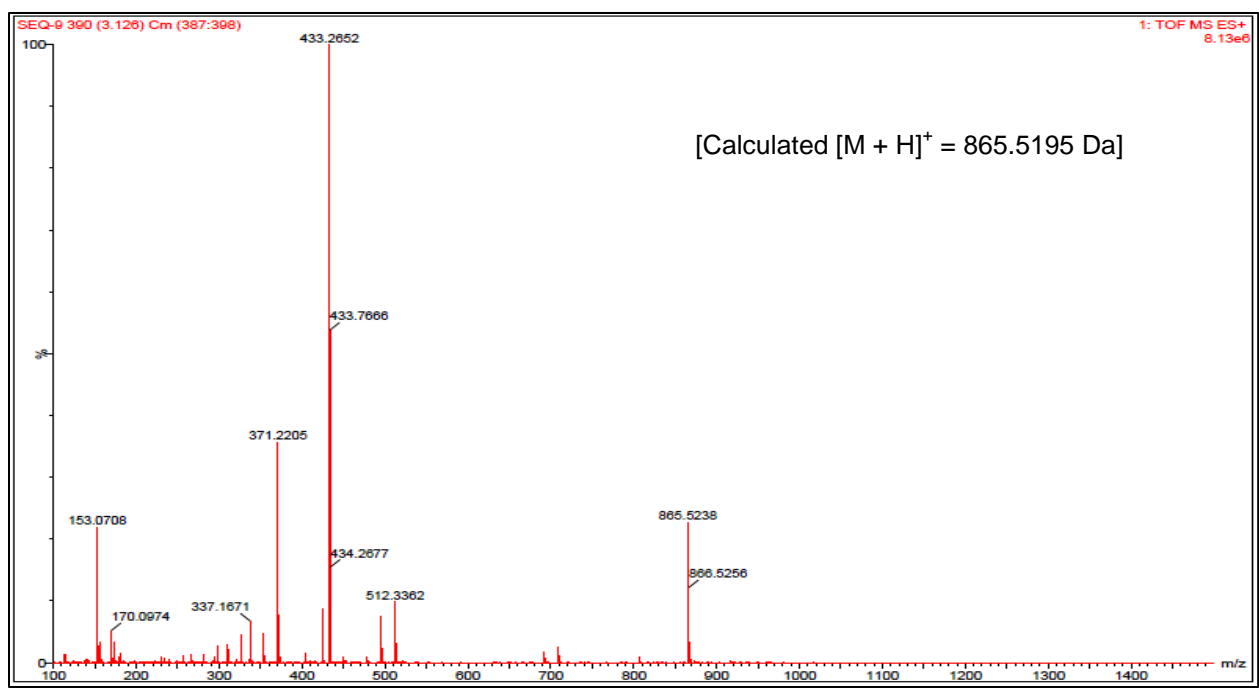

S-9

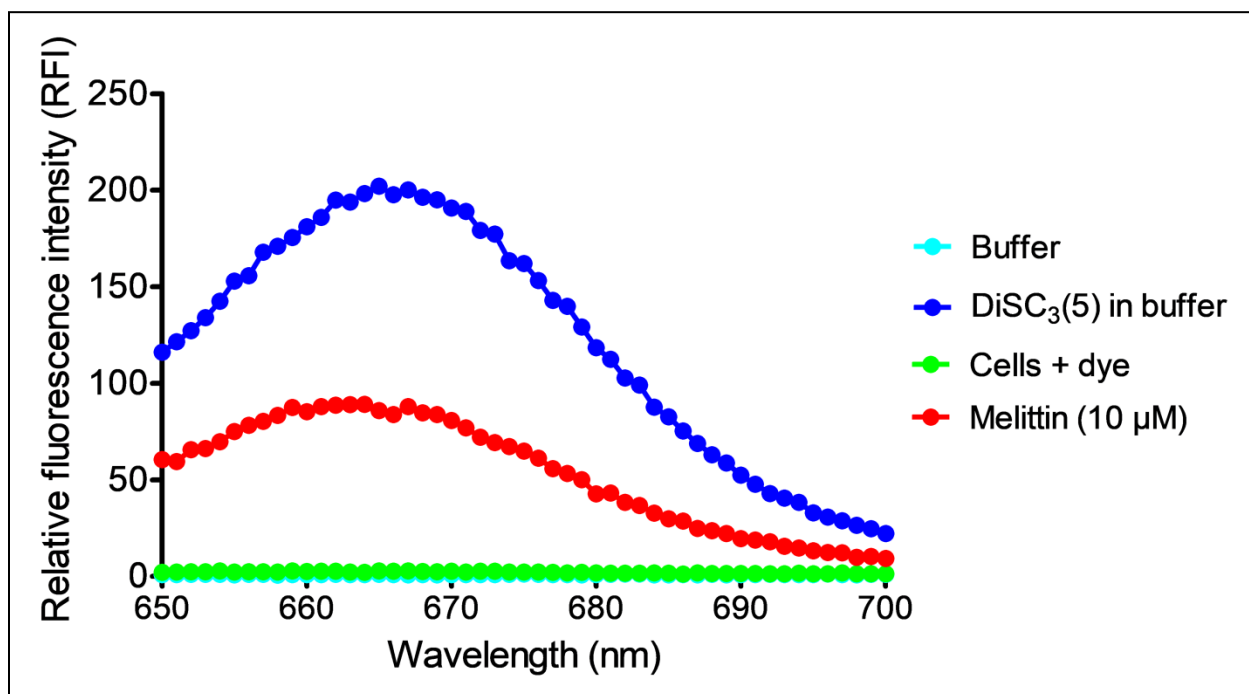

**Fig. S3. Membrane depolarization mechanism using DiSC<sub>3</sub>(5) dye.** Fluorescence emission spectrum of buffer (5 mM HEPES, 20 mM glucose, pH 7.2), DiSC<sub>3</sub>(5) dye in buffer, MRSA cells loaded with DiSC<sub>3</sub>(5) dye for 30 min and melittin (10 μM) added to fluorescence quenched dye-loaded cells. The fluorescence spectrum was acquired at an excitation wavelength of 622 nm on a Shimadzu RF-5301 PC spectrofluorimeter and emission was recorded between 650-700 nm. Slit width of 3 nm was used for both excitation and emission and the temperature was maintained at 37°C for the experiment.

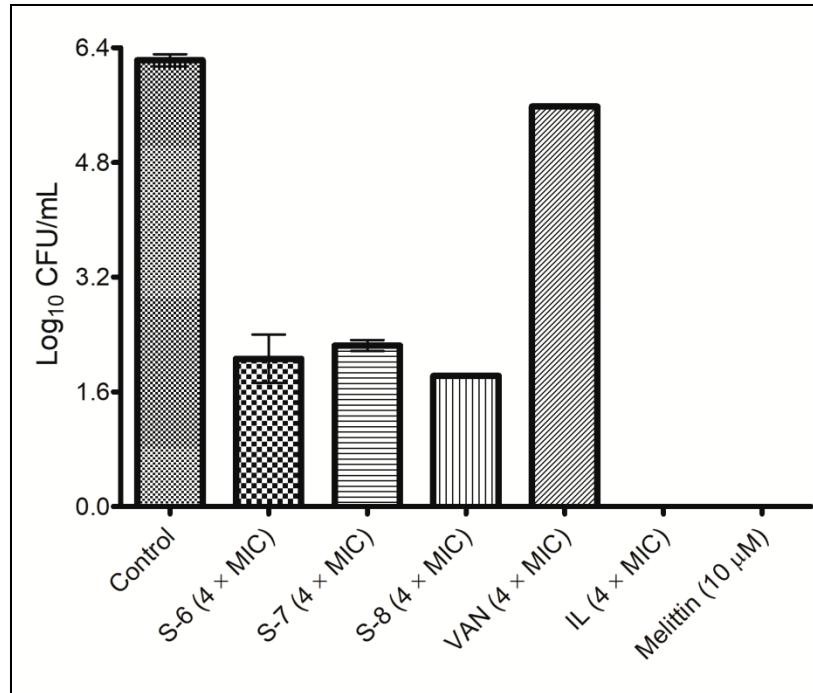

**Fig. S4. Cell viability corresponding to membrane depolarization experiment.** The dye-loaded cells suspended in HEPES-glucose buffer (5 mM, 20 mM glucose, pH 7.2) were incubated with different test agents for 2 min and subsequently diluted appropriately and plated on BHI agar plates. The plates were incubated at 37 °C for 16-18 h and colonies were counted. The experiment was repeated on two different days and mean  $\pm$  S.D. is presented here. The differences between control vs. all treatments were statistically significant ( $p < 0.05$ ) except for VAN. The MIC values for test peptidomimetics against MRSA ATCC 33591 strain were as follows: S-6 (11.3  $\mu\text{g/mL}$ ), S-7 (11.3  $\mu\text{g/mL}$ ), S-8 (1.4  $\mu\text{g/mL}$ ), IL (3.2  $\mu\text{g/mL}$ ) and VAN (1.4  $\mu\text{g/mL}$ ).

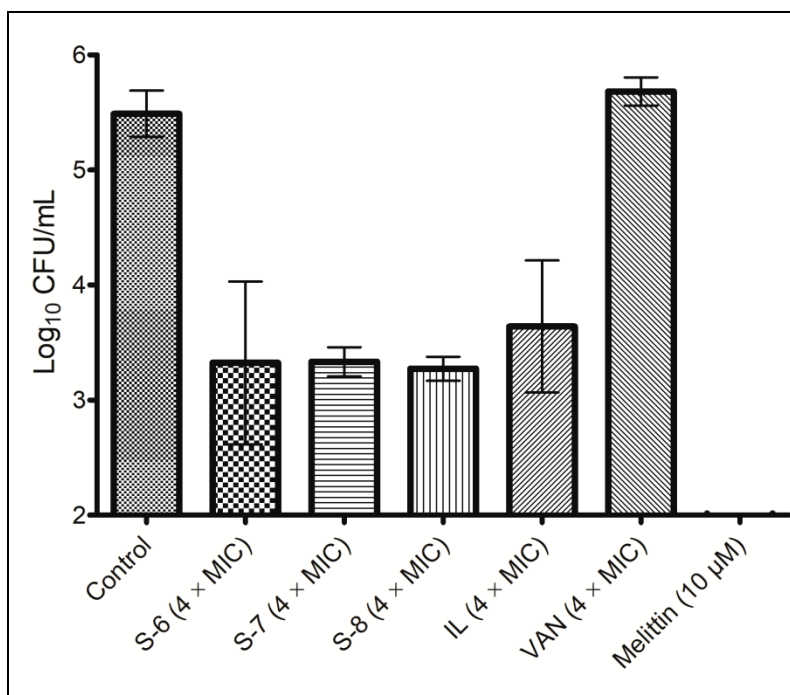

**Fig. S5. Cell viability corresponding to calcein dye leakage experiment.** The dye-loaded cells suspended in PBS (10 mM, 150 mM NaCl, pH 7.4) were incubated with different test agents for 2 h and subsequently diluted appropriately and plated on BHI agar plates. The plates were incubated at 37 °C for 16-18 h and colonies were counted. The experiment was repeated on two different days and mean  $\pm$  S.D. is presented here. The differences between control vs. all treatments were statistically significant ( $p < 0.05$ ) except for VAN. The MIC values for test peptidomimetics against MRSA ATCC 33591 strain were as follows: S-6 (11.3  $\mu\text{g/mL}$ ), S-7 (11.3  $\mu\text{g/mL}$ ), S-8 (1.4  $\mu\text{g/mL}$ ), IL (3.2  $\mu\text{g/mL}$ ) and VAN (1.4  $\mu\text{g/mL}$ ).

## **DNA gel retardation assay**

**Methodology:** Towards comparing the relative DNA binding ability we performed a gel retardation experiment using a protocol described previously with slight modifications (references 67 and 68 in manuscript). Briefly, different concentrations of test peptidomimetics were incubated with 100 ng plasmid DNA (pBluescript II SK+) for 1 h at room temperature. After incubation, 4  $\mu$ L native loading buffer was added to the samples and a 20  $\mu$ L aliquot was subjected to 1% agarose gel electrophoresis in 0.5  $\times$  Tris borate-EDTA buffer (45 mM Tris-borate, 1 mM EDTA, pH 8.0). The plasmid DNA was supplied by Agilent Technologies and was used without further purification. The composition of binding buffer was: 5% glycerol, 10 mM Tris-HCl (pH 8.0), 1 mM EDTA, 1 mM dithiothreitol, 20 mM KCl and 50  $\mu$ g/mL bovine serum albumin (BSA). The composition of native loading buffer was: 10% Ficoll 400, 10 mM Tris-HCl (pH 7.5), 50 mM EDTA, 0.25% bromophenol blue and 0.25% xylene cyanol. The experiment was repeated on two different days and similar results were obtained. Representative data is shown here.

**Results:** To evaluate if intracellular targeting/DNA binding mechanisms are operative for S-7 and S-8 mediated killing, we performed a relative plasmid DNA binding experiment. Since DNA is negatively charged and the designed peptidomimetics are positively charged, therefore, to rule out electrostatic interactions we also performed gel retardation for S-1 which carries same charge (+3) as S-7 and S-8 but does not show activity against the tested bacterial strains up to 45.4  $\mu$ g/mL.

The results showed that S-1 completely retarded DNA mobility at 50  $\mu\text{g}/\text{mL}$  (Fig. S6). S-7 also completely retarded the movement of plasmid DNA up to 50  $\mu\text{g}/\text{mL}$  while at lower concentrations the DNA bands got smeared in the gel reflecting complexation capacity of S-7 at lower concentrations tested. In comparison, S-8 showed retardation in movement of plasmid DNA at 10  $\mu\text{g}/\text{mL}$  while IL also caused retardation at 23.8  $\mu\text{g}/\text{mL}$ .

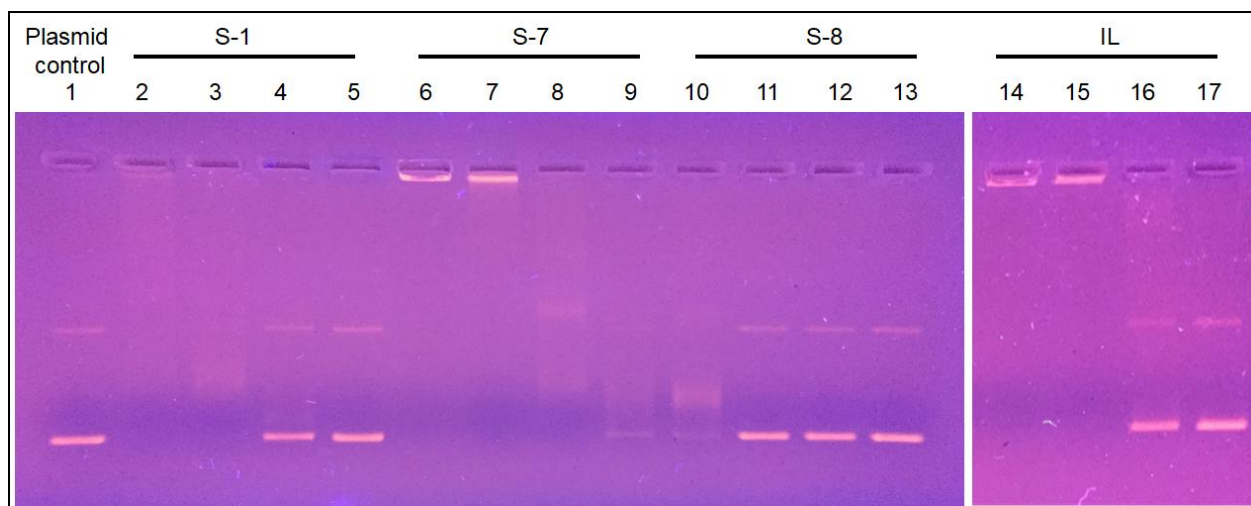

**Fig. S6. Comparative DNA binding ability of designed peptidomimetics.** The plasmid DNA binding ability of designed peptidomimetics and IL were compared using native 1% agarose gel electrophoresis. Lane 1: plasmid DNA; lane 2: 100  $\mu\text{g}/\text{mL}$  S-1; lane 3: 50  $\mu\text{g}/\text{mL}$  S-1; lane 4: 25  $\mu\text{g}/\text{mL}$  S-1; lane 5: 12.5  $\mu\text{g}/\text{mL}$  S-1; lane 6: 100  $\mu\text{g}/\text{mL}$  S-7; lane 7: 50  $\mu\text{g}/\text{mL}$  S-7; lane 8: 25  $\mu\text{g}/\text{mL}$  S-7; lane 9: 12.5  $\mu\text{g}/\text{mL}$  S-7; lane 10: 10  $\mu\text{g}/\text{mL}$  S-8; lane 11: 5  $\mu\text{g}/\text{mL}$  S-8; lane 12: 2.5  $\mu\text{g}/\text{mL}$  S-8; lane 13: 1.25  $\mu\text{g}/\text{mL}$  S-8; lane 14: 47.6  $\mu\text{g}/\text{mL}$  IL; lane 15: 23.8  $\mu\text{g}/\text{mL}$  IL; lane 16: 11.9  $\mu\text{g}/\text{mL}$  IL and lane 17: 5.9  $\mu\text{g}/\text{mL}$  IL. For the assay IL was run under identical experimental conditions in a separate gel.

Thus, whereas S-7 was able to retard DNA movement near its MIC (12.5  $\mu\text{g}/\text{mL}$ ) for S-8 (10  $\mu\text{g}/\text{mL}$ ) and IL (23.8  $\mu\text{g}/\text{mL}$ ) concentrations higher than MIC were obligatory to show retardation in DNA movement.
